# Supplementary material for: Systematic Review of the Short-Term versus Long-Term Duration of Antibiotic Management for Neutropenic Fever in Patients with Cancer
Source: MDPI journal article supplement (doi:10.3390/cancers15051611), 2023-03-05
Supplement: s1 [file s1]

Keywords to search the case report of short-term duration versus long-term in febrile neutropenia

A literature search was conducted

- CENTRAL(September 30, 2022)

#1 MeSH descriptor: [Neutropenia] explode all trees

#2 neutropaeni\* or neutropeni\* or granulocytopeni\* or granulocytopaeni\*

#3 #1 or #2

#4 MeSH descriptor: [Anti-Infective Agents] explode all trees

#5 antibiotic\* or antimicrobial\* or anti-microbial\* or antibacterial\* or anti-bacterial\*

#6 #4 or #5

#7 MeSH descriptor: [] explode all trees and with qualifier(s): [administration & dosage - AD]

#8 duration or continue\* or continuation or carry on or discontinue\* or discontinuation or stop\*

#9 #7 or #8

#10 #3 and #7 and #9

#11 #10 with Cochrane Library publication date from Jan 2018 to present, in Trials

- Embase (September 30, 2022)

(('neutropenia'/exp OR (neutropaeni\* OR neutropeni\* OR granulocytopeni\* OR granulocytopaeni\*))

AND ('antiinfective agent'/exp OR (antibiotic\* OR antimicrobial\* OR anti-microbial\* OR

antibacterial\* OR anti-bacterial\*)) AND ((duration OR continue\* OR continuation OR carry) AND  
 on OR discontinue\* OR discontinuation OR stop\*)) AND ('crossover procedure'/exp OR 'double  
 blind procedure'/exp OR 'randomized controlled trial'/exp OR 'single blind procedure'/exp OR  
 random\* OR factorial\* OR ((crossover\* OR cross) AND over\* OR cross-over\*) OR placebo\* OR  
 double\* NEXT/1 blind\* OR singl\* NEXT/1 blind\* OR assign\* OR allocat\* OR volunteer\*) AND  
 [2018-2022]/py

- Medline (September 30, 2022)

1. Neutropenia/

2. (neutropaeni\* or neutropeni\* or granulocytopeni\* or granulocytopaeni\*).mp.

3. 1 or 2

4. exp Anti-Infective Agents/

5. (antibiotic\* or antimicrobial\* or anti-microbial\* or antibacterial\* or anti-bacterial\*).mp.

6. 4 or 5

7. (duration or continue\* or continuation or carry on or discontinue\* or discontinuation or stop\*).mp.

8. 3 and 6 and 7

9. randomized controlled trial.pt.

10. controlled clinical trial.pt.

11. randomized.ab.

12. placebo.ab.

13. clinical trials as topic.sh.

14. randomly.ab.

15. trial.ti.

16. 9 or 10 or 11 or 12 or 13 or 14 or 15

17. 8 and 16

18. (animals not (humans and animals)).sh.

19. 17 not 18

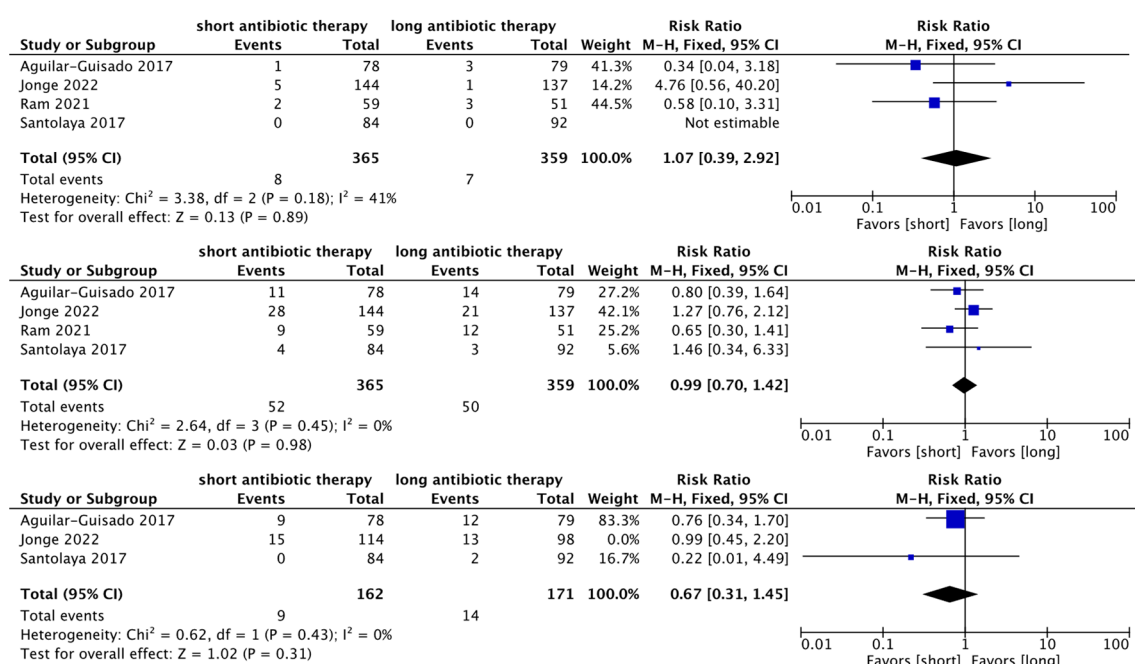

**Supplemental Figure S1.** Summary of findings of short-term duration of antibiotics compared with long-term duration of antibiotics presenting Forest plot for only hematological malignancy patients including stem cell transplantation- Jonge et al. [4], Ram et al. [14], Aguilar-Guisado 2017 [8], and Santolaya et al.[16], mortality(above), clinical failure(middle), bacteremia(below). Total risk ratio across 1 (left favors the short, right favors long)

abbreviation: RCT; randomized control study, CI; confidence interval.

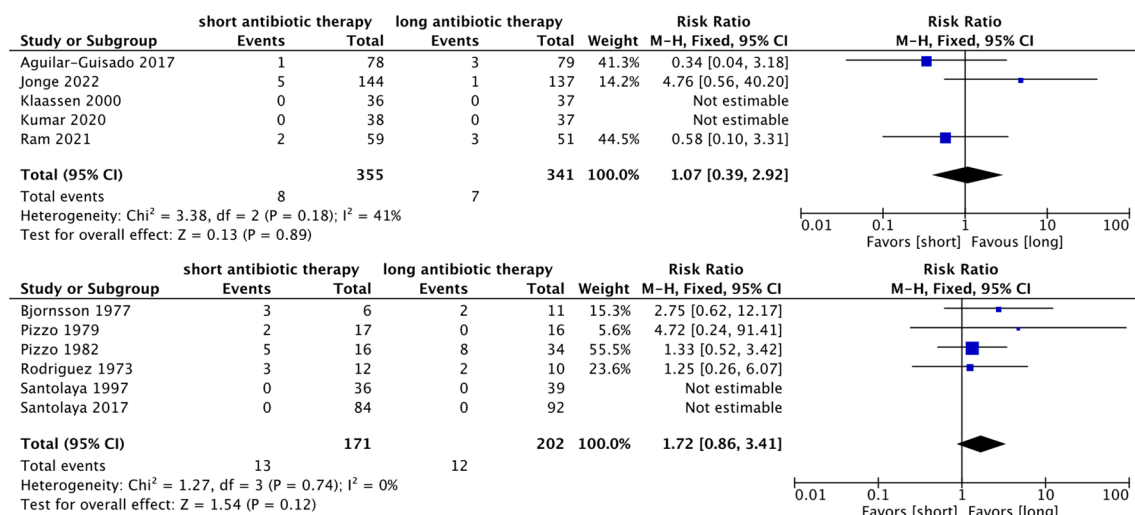

**Supplemental Figure S2.** Summary of findings of short-term duration of antibiotics compared with long-term duration of antibiotics presenting Forest plot for mortality in low(above) and unclear( below) allocation concealment bias as sensitivity analysis..

abbreviation: RCT; randomized control study, CI; confidence interval.
